1           **Multi-trait random regression models**  
2           **increase genomic prediction accuracy for a**  
3           **temporal physiological trait derived from**  
4           **high-throughput phenotyping**

5           Toshimi Baba<sup>1</sup>, Mehdi Momen<sup>1</sup>, Malachy T. Campbell<sup>1</sup>, Harkamal Walia<sup>2</sup>,  
6                                           and Gota Morota<sup>1\*</sup>

7           <sup>1</sup>Department of Animal and Poultry Sciences, Virginia Polytechnic Institute  
8                                           and State University, Blacksburg, VA, USA 24061

9           <sup>2</sup>Department of Agronomy and Horticulture, University of Nebraska,  
10                                           Lincoln, NE 68583

11 Keywords: Genomic correlation, Genomic prediction, High-throughput phenotyping, Longi-  
12 tudinal trait, Random regression model

13

14 Running title: Multi-trait longitudinal genetic analysis

15

16 ORCID: 0000-0002-6637-2056 (TB), 0000-0002-2562-2741 (MM), 0000-0002-8257-3595 (MTC),  
17 0000-0002-9712-5824 (HW), and 0000-0002-3567-6911 (GM).

18

19 \* Corresponding author:

20

21 Gota Morota

22 Department of Animal and Poultry Sciences

23 Translational Plant Sciences Program

24 175 West Campus Drive

25 Blacksburg, Virginia 24061 USA.

26 Virginia Polytechnic Institute and State University

27 E-mail: morota@vt.edu

28

## 29 Abstract

30 Random regression models (RRM) are used extensively for genomic inference and prediction  
31 of time-valued traits in animal breeding, but only recently have been used in plant systems.  
32 High-throughput phenotyping (HTP) platforms provide a powerful means to collect high-  
33 dimensional phenotypes throughout the growing season for large populations. However, to  
34 date, selection of an appropriate statistical genomic framework to integrate multiple temporal  
35 traits for genomic prediction in plants remains unexplored. Here, we demonstrate the utility  
36 of a multi-trait RRM (MT-RRM) for genomic prediction of daily water usage (WU) in rice  
37 (*Oryza sativa*) through joint modeling with shoot biomass (projected shoot area, PSA).  
38 Three hundred and fifty-seven accessions were phenotyped daily for WU and PSA over 20  
39 days using a greenhouse-based HTP platform. MT-RRMs that modeled additive genetic  
40 and permanent environmental effects for both traits using quadratic Legendre polynomials  
41 were used to assess genomic correlations between traits and genomic prediction for WU.  
42 Predictive abilities of the MT-RRMs were assessed using two cross-validation (CV) scenarios.  
43 The first scenario was designed to predict genetic values for WU at all time points for a set  
44 of accessions with unobserved WU. The second scenario was designed to forecast future  
45 genetic values for WU for a panel of known accessions with records for WU at earlier time  
46 periods. In each scenario we evaluated two MT-RRMs in which PSA records were absent or  
47 available for time points in the testing population. Moderate to strong genomic correlations  
48 between WU and PSA were observed across the days of imaging (0.38-0.80). In both CV  
49 scenarios, MT-RRMs showed better predictive abilities compared to single-trait RRM, and  
50 prediction accuracies were greatly improved when PSA records were available for the testing  
51 population. In summary, these frameworks provide an effective approach to predict temporal  
52 physiological traits that are difficult or expensive to quantify in large populations.

## 53 Background

54 High-throughput phenotyping (HTP) is an innovative tool in plant breeding. HTP pro-  
55 vides precise and non-destructive estimation of multiple complex traits that describe growth  
56 and development (e.g., height, biomass, and flowering time) or environmental responses  
57 (e.g., chlorophyll fluorescence, canopy temperature, and water content) using non-destructive  
58 image-based phenotyping (Araus et al., 2018; Morota et al., 2019). These HTP data mitigate  
59 extensive costs associated with manual phenotyping, and can be used to better capture the  
60 plant’s phenome. In the context of plant breeding and genetics, these data can be used to  
61 improve the prediction of breeding values for a target trait of interest, thereby improving  
62 the accuracy of selection, as well as provide insights into how secondary traits influence a  
63 trait of interest (Araus et al., 2018; Morota et al., 2019; Voss-Fels et al., 2019).

64 For many genome-enabled breeding programs, developing phenotyping and statistical  
65 approaches to improve prediction of breeding values and accelerate selection is the primary  
66 objective (Campbell et al., 2018; Juliana et al., 2019; Voss-Fels et al., 2019). In many breed-  
67 ing programs, the agronomic value of breeding materials is evaluated using multiple traits.  
68 These traits are often correlated at the genetic level. One standard approach for predicting  
69 breeding values is to jointly fit all phenotypes in a single model using a multi-trait (MT)  
70 approaches (Kadarmideen et al., 2003). These approaches capture the genetic covariances  
71 between traits, and have been shown to improve the prediction of breeding values compared  
72 to single trait approaches for phenotypes with limited records or low heritability (Calus and  
73 Veerkamp, 2011; Jia and Jannink, 2012; Guo et al., 2014). Thus, the MT framework can be  
74 particularly advantageous when the target trait has low heritability, but is correlated with  
75 a more heritable trait; or when the trait of interest is difficult or costly to evaluate and  
76 only incomplete data can be collected, and the trait of interest is correlated with a trait  
77 that is easier and cheaper to evaluate. Thus, in the context of HTP, MT genomic predic-  
78 tion approaches can accommodate the high-dimensional multi-trait data generated by these  
79 platforms. Moreover, secondary phenotypes recorded with HTP can be included in the pre-

80 diction framework to improve prediction of a target trait such as yield. These applications  
81 have been shown in a recent study by (Sun et al., 2017).

82 While several studies have highlighted the advantages of MT frameworks for genomic  
83 prediction, HTP-derived MT data often introduce an additional level of complexity-the time  
84 axis. The standard MT framework may not be appropriate in cases where multiple pheno-  
85 types are recorded at regular intervals throughout the growing season or for the duration  
86 of the experiment. While MT frameworks can be fit to these data, the assumptions of the  
87 MT framework bring to question whether the conventional MT model should be used. For  
88 instance, one assumption is that each phenotype in the MT model is finite characteristic  
89 (Kirkpatrick et al., 1990). While this is certainly true for two phenotypes such as yield or  
90 protein content, this is certainly not the case for a phenotype recorded at two time points  
91 (Kirkpatrick et al., 1990). Temporal phenotypes are infinite-dimensional traits, meaning  
92 that although there are only records for discrete time intervals, we expect that the pheno-  
93 type will vary continuously with time between the two intervals. With these data, a more  
94 appropriate solution is to treat the temporal phenotypes as continuous characteristics and  
95 perform genetic analyses using random regression models (RRM).

96 RRM model the covariance between time points as a continuous function of time (Mrode,  
97 2014). While several covariance functions can be utilized, Legendre polynomials or B-splines  
98 are routinely used (Schaeffer, 2004). With RRM, temporal phenotypes are partitioned into  
99 genetic, permanent environmental effects, and residuals (Mrode, 2014). With repeated mea-  
100 surements, it is assumed that there is additional resemblance between records of an individ-  
101 ual due to environmental factors or circumstances that affect the records of the individual  
102 permanently (Mrode, 2014). Thus, the random permanent environment term captures this  
103 non-genetic resemblance between time points. Covariance functions are used to model both  
104 genetic and permanent environmental effects (Kirkpatrick et al., 1990; Schaeffer and Dekkers,  
105 1994; Meyer and Hill, 1997; Schaeffer, 2004). Thus, the RRM prediction framework provides  
106 solutions for random regression coefficients for random effects. Given coefficients for ran-

107 dom genetic effects, the genetic values at any time point can be easily calculated. Recently,  
108 RRM have been used for genomic analyses of longitudinal image-based HTP traits in plants  
109 (Campbell et al., 2018, 2019; Momen et al., 2019a). The ability of these frameworks to  
110 forecast future phenotypes using the records at earlier time has been shown by Campbell  
111 et al. (2018) and Momen et al. (2019a) based on a digital metric for shoot biomass, known  
112 as projected shoot area (PSA). PSA is a digital metric derived from images taken of each  
113 plant and is highly correlated with destructive measures of shoot biomass (Golzarian et al.,  
114 2011; Berger et al., 2010; Campbell et al., 2015).

115 However, given the capability of HTP to collect multiple temporal phenotypes, one un-  
116 resolved question in plant breeding is how to jointly model multiple temporal phenotypes.  
117 To address this, we aimed to integrate the RRM framework for temporal traits into a MT  
118 model. We utilized a data set in which PSA and water use (WU) was recorded daily over  
119 a period of 20 days. The aim of the study was to evaluate the ability of multi-trait ran-  
120 dom regression model (MT-RRM) and a single-trait random regression model (ST-RRM) to  
121 predict WU by borrowing information from PSA. The rationale is that WU is much more  
122 difficult to evaluate in most studies compared to PSA and is likely to be more influenced  
123 by environmental effects, and thus have lower heritability compared to shoot biomass. The  
124 models were compared using several cross-validation (CV) scenarios.

## 125 **Materials and Methods**

### 126 **Plant materials and greenhouse conditions**

127 This study utilized HTP records from 357 of the 421 accessions of rice (*Oryza sativa*) diversity  
128 panel 1 (RDP1) (Zhao et al., 2011). Sixty four accessions were excluded due to lack of seed  
129 availability or poor germination. Seeds were treated with Thiram fungicide and germinated  
130 on moist paper towels in plastic boxes for three days. Three uniformly germinated seedlings  
131 were selected for each accession and transplanted to pots (150mm diameter x 200 mm height)  
132 filled with 2.5 kg of UC Mix. The plants were grown in saturated soil on greenhouse benches  
133 prior to phenotyping.

134 Plants were thinned to one seedling per pot seven days after transplant (DAT), and two  
135 layers of blue mesh were placed on top of the pots to reduce evaporation. The plants were  
136 loaded on to the imaging system at 13 DAT. The automated phenotyping system was set  
137 to maintain all plants at 90% field capacity. The experiment followed a partially replicated  
138 design (Cullis et al., 2006). The p-rep design was modified to accommodate the two water  
139 treatments and allow comparison of treatments within each accession. Each accession was  
140 assigned to two consecutive pots, and the water treatments were randomly assigned to each  
141 pot. Each experiment consisted of 357 accessions from RDP1 and was repeated three times  
142 from February to April 2016. The accessions were distributed across 432 pots positioned  
143 across 24 lanes. In each experiment, 54 accessions were randomly selected and replicated  
144 twice. All experiments were conducted at the Plant Accelerator Australian Plant Phenomics  
145 Facility, at the University of Adelaide, SA, Australia.

### 146 **Phenotypic data**

147 Beginning at 13 DAT all plants were phenotyped daily for shoot biomass and WU using the  
148 automated greenhouse system, and each plant was imaged daily over a period of 20 days  
149 using a visible (red-green-blue / RGB) camera (Basler Pilot piA240012 gc, Ahrensburg,

150 Germany). For each plant, three images were taken in each recording day: two side-view  
151 angles separated by 90 degree and a single top view. Plant pixels were extracted from RGB  
152 images using the LemnaGrid software, and the plant pixels from the three images were  
153 summed to obtain a digital measure of shoot biomass. We refer to this metric as PSA.  
154 Several studies have shown this to be an accurate proxy for shoot biomass (Golzarian et al.,  
155 2011; Campbell et al., 2015; Knecht et al., 2016).

156 After imaging, each plant was watered to a predefined weight to maintain 90% field  
157 capacity. The automated watering system collects the start weight, final weight and amount  
158 of water that was added for each pot. Thus, from these data we can estimate the amount of  
159 water that lost by evapotranspiration each day. WU was calculated as  $WU_t = Potwt_{t-1} -$   
160  $Potwt_t$ . Where  $Potwt_{t-1}$  is the weight of the pot after watering on the previous day, and  
161  $Potwt_t$  is the weight of the pot on the current day prior to watering (Momen et al., 2019b).

Best linear unbiased estimators (BLUE) were obtained for each accession and day using  
the following model

$$y_{ij} = \mu + A_i + exp_j + rep_r + e_{ij}$$

162 where  $\mu$  is the overall mean,  $A_i$  is the fixed effect of the  $i^{th}$  accession,  $exp_j$  is the random  
163 effect of the  $j^{th}$  experiment and  $rep_r$  is the random effect of the  $r^{th}$  replicate. After these  
164 processes, 7,140 records from 357 accessions were available for further analysis.

## 165 Genotypic data

166 All accessions were genotyped with a 44,000 single nucleotide polymorphisms (SNPs) array  
167 (Zhao et al., 2011). Genotypic data regarding the rice accessions can be downloaded from the  
168 rice diversity panel website (<http://www.ricediversity.org/>). SNPs with call rate  $\leq 0.95$  and  
169 minor allele frequency  $\leq 0.05$  were removed. Missing genotypes were imputed using Beagle  
170 software version 3.3.2 (Browning and Browning, 2007) following Momen et al. (2019b). A  
171 total of 34,993 SNPs remained for downstream analyses.



## 172 Single-trait random regression model

Campbell et al. (2018) and Momen et al. (2019a) have applied ST-RRM for PSA. In this study, a similar statistical model was used to model WU. The model is given by

$$y_{jt} = \sum_{k=0}^2 \phi(t)_{jk} b_k + \sum_{k=0}^2 \phi(t)_{jk} u_{jk} + \sum_{k=0}^2 \phi(t)_{jk} p_{jk} + e_{jt},$$

where  $y_{jt}$  is the BLUE of  $j$ th accession for WU at time point  $t$ ,  $b_k$  is the  $k$ th fixed Legendre regression coefficients for overall mean,  $u_{jk}$  is the  $k$ th random regression coefficients for additive genetic effect,  $p_{jk}$  is the  $k$ th random regression coefficients for permanent environmental effect,  $e_{jt}$  is the vector of residuals, and  $\phi(t)_{jk}$  is a time covariate coefficient defined by a  $k$ th Legendre polynomial evaluated at time point  $t$  belonging to the  $j$ th accession. We set quadratic Legendre polynomials of all the effects, based on the results of Momen et al. (2019a) which investigated the prediction accuracy of PSA using ST-RRM. The first order of the Legendre polynomial (i.e., an intercept) was standardized to 1 (Gengler et al., 1999). In matrix notation, the model is given by

$$\mathbf{y} = \mathbf{X}\mathbf{b} + \mathbf{Z}\mathbf{u} + \mathbf{Q}\mathbf{p} + \mathbf{e},$$

where  $\mathbf{y}$  is the vector of observations for WU,  $\mathbf{b}$  is the vector of fixed effect,  $\mathbf{u}$  is the vector of random additive genetic effect,  $\mathbf{p}$  is the vector of random permanent environmental effect,  $\mathbf{e}$  is the vector of random residual effect, and  $\mathbf{X}$ ,  $\mathbf{Z}$ , and  $\mathbf{Q}$  are corresponding incidence matrices. The covariance structures were defined as the following.

$$\text{Var} \begin{bmatrix} \mathbf{u} \\ \mathbf{p} \\ \mathbf{e} \end{bmatrix} = \begin{bmatrix} \mathbf{C} \otimes \mathbf{G} & \mathbf{0} & \mathbf{0} \\ \mathbf{0} & \mathbf{D} \otimes \mathbf{I} & \mathbf{0} \\ \mathbf{0} & \mathbf{0} & \mathbf{I} \otimes \mathbf{R} \end{bmatrix},$$

where  $\mathbf{G}$  is a genomic relationship matrix calculated by  $\mathbf{W}\mathbf{W}'/m$  according to VanRaden (2008),  $\mathbf{W}$  is a centered and scaled matrix,  $m$  is the number of SNPs,  $\mathbf{I}$  is an identity matrix,  $\mathbf{C}$  and  $\mathbf{D}$  are covariance matrices of additive genetic and permanent environmental effects,  $\mathbf{R}$  is a diagonal matrix of heterogeneous residual variance at each time period, and  $\otimes$  is the Kronecker product. The covariance matrices  $\mathbf{C}$  and  $\mathbf{D}$  are defined as follows.

$$\mathbf{C} = \begin{bmatrix} v_u^0 & v_u^{01} & v_u^{02} \\ v_u^{10} & v_u^1 & v_u^{12} \\ v_u^{20} & v_u^{21} & v_u^2 \end{bmatrix}, \quad \mathbf{D} = \begin{bmatrix} v_p^0 & v_p^{01} & v_p^{02} \\ v_p^{10} & v_p^1 & v_p^{12} \\ v_p^{20} & v_p^{21} & v_p^2 \end{bmatrix},$$

173 where  $v_u^k$  and  $v_p^k$  are the variance components of  $k$ th order random regression coefficients  
 174 for additive genetic and permanent environment effects, respectively, and  $v_u^{kl}$  and  $v_p^{kl}$  are the  
 175 covariances between  $k$ th and  $l$ th order random regression coefficients for additive genetic and  
 176 permanent environmental effects, respectively.

## 177 Multi-trait random regression model

For MT-RRM, the ST-RRM for WU described above is expanded to include PSA information as follows.

$$\begin{bmatrix} \mathbf{y}_1 \\ \mathbf{y}_2 \end{bmatrix} = \begin{bmatrix} \mathbf{X}_1 & \mathbf{0} \\ \mathbf{0} & \mathbf{X}_2 \end{bmatrix} \begin{bmatrix} \mathbf{b}_1 \\ \mathbf{b}_2 \end{bmatrix} + \begin{bmatrix} \mathbf{Z}_1 & \mathbf{0} \\ \mathbf{0} & \mathbf{Z}_2 \end{bmatrix} \begin{bmatrix} \mathbf{u}_1 \\ \mathbf{u}_2 \end{bmatrix} + \begin{bmatrix} \mathbf{Q}_1 & \mathbf{0} \\ \mathbf{0} & \mathbf{Q}_2 \end{bmatrix} \begin{bmatrix} \mathbf{p}_1 \\ \mathbf{p}_2 \end{bmatrix} + \begin{bmatrix} \mathbf{e}_1 \\ \mathbf{e}_2 \end{bmatrix},$$

where subscripts 1 and 2 refer to WU and PSA, respectively. The covariance structures of  $\mathbf{C}$  and  $\mathbf{D}$  were also expanded as follows.

$$\mathbf{C} = \begin{bmatrix} \mathbf{C}_1 & \mathbf{C}_{12} \\ \mathbf{C}_{12}^T & \mathbf{C}_2 \end{bmatrix}, \quad \mathbf{D} = \begin{bmatrix} \mathbf{D}_1 & \mathbf{D}_{12} \\ \mathbf{D}_{12}^T & \mathbf{D}_2 \end{bmatrix}$$

178 where  $\mathbf{C}_1$  and  $\mathbf{C}_2$  ( $\mathbf{D}_1$  and  $\mathbf{D}_2$ ) are  $3 \times 3$  variance-covariance submatrices of random regression  
 179 coefficients for each trait and  $\mathbf{C}_{12}$  ( $\mathbf{D}_{12}$ ) is a  $3 \times 3$  covariance submatrix of random regression  
 180 coefficients between the traits. Thus, the whole  $\mathbf{C}$  and  $\mathbf{D}$  matrices take the form

$$\mathbf{C} = \begin{bmatrix} v_{u_1}^0 & v_{u_1}^{01} & v_{u_1}^{02} & v_{u_{12}}^{00} & v_{u_{12}}^{01} & v_{u_{12}}^{02} \\ v_{u_1}^{10} & v_{u_1}^1 & v_{u_1}^{12} & v_{u_{12}}^{10} & v_{u_{12}}^{11} & v_{u_{12}}^{12} \\ v_{u_1}^{20} & v_{u_1}^{21} & v_{u_1}^2 & v_{u_{12}}^{20} & v_{u_{12}}^{21} & v_{u_{12}}^{22} \\ v_{u_{21}}^{00} & v_{u_{21}}^{10} & v_{u_{21}}^{20} & v_{u_2}^0 & v_{u_2}^{01} & v_{u_2}^{02} \\ v_{u_{21}}^{10} & v_{u_{21}}^{11} & v_{u_{21}}^{21} & v_{u_2}^{10} & v_{u_2}^1 & v_{u_2}^{12} \\ v_{u_{21}}^{20} & v_{u_{21}}^{21} & v_{u_{21}}^{22} & v_{u_2}^{20} & v_{u_2}^{21} & v_{u_2}^2 \end{bmatrix}, \mathbf{D} = \begin{bmatrix} v_{p_1}^0 & v_{p_1}^{01} & v_{p_1}^{02} & v_{p_{12}}^{00} & v_{p_{12}}^{01} & v_{p_{12}}^{02} \\ v_{p_1}^{10} & v_{p_1}^1 & v_{p_1}^{12} & v_{p_{12}}^{10} & v_{p_{12}}^{11} & v_{p_{12}}^{12} \\ v_{p_1}^{20} & v_{p_1}^{21} & v_{p_1}^2 & v_{p_{12}}^{20} & v_{p_{12}}^{21} & v_{p_{12}}^{22} \\ v_{p_{21}}^{00} & v_{p_{21}}^{10} & v_{p_{21}}^{20} & v_{p_2}^0 & v_{p_2}^{01} & v_{p_2}^{02} \\ v_{p_{21}}^{10} & v_{p_{21}}^{11} & v_{p_{21}}^{21} & v_{p_2}^{10} & v_{p_2}^1 & v_{p_2}^{12} \\ v_{p_{21}}^{20} & v_{p_{21}}^{21} & v_{p_{21}}^{22} & v_{p_2}^{20} & v_{p_2}^{21} & v_{p_2}^2 \end{bmatrix},$$

where  $v_{u_1}^k$  and  $v_{p_1}^k$  ( $v_{u_2}^k$  and  $v_{p_2}^k$ ) are variance components of  $k$ th order random regression coefficients for additive genetic and permanent environment terms for WU (PSA),  $v_{u_1}^{kl}$  and  $v_{p_1}^{kl}$  ( $v_{u_2}^{kl}$  and  $v_{p_2}^{kl}$ ) are covariances between  $k$ th and  $l$ th order random regression coefficients for additive genetic or permanent environmental effects within WU (PSA), and  $v_{u_{12}}^{kl}$  and  $v_{p_{12}}^{kl}$  are covariances between  $k$ th and  $l$ th order random regression coefficients for additive genetic and permanent environmental effects between WU and PSA, respectively. As with ST-RRM, we assumed the residual variance for each day of imaging was unique. Thus, a heterogeneous residual variance structure was used for MT-RRM. The matrix of residual variance at time  $t$  ( $\mathbf{R}_{(t)}^*$ ) is presented as:

$$\mathbf{R}_{(t)}^* = \begin{bmatrix} v_{e_{1(t)}} & v_{e_{12(t)}} \\ v_{e_{21(t)}} & v_{e_{2(t)}} \end{bmatrix}$$

181 where  $v_{e_{1(t)}}$  and  $v_{e_{2(t)}}$  are residual variances for WU and PSA, respectively, and  $v_{e_{12(t)}}$  ( $v_{e_{21(t)}}$ )  
 182 is the residual covariance between WU and PSA at time point  $t$ .

## 183 Estimation of genomic correlation at each time point

Genomic correlation between WU and PSA at each time point from MT-RRM was computed as follows.

$$\frac{\mathbf{t}_i \mathbf{C}_{12} \mathbf{t}'_i}{\sqrt{\mathbf{t}_i \mathbf{C}_1 \mathbf{t}'_i} \sqrt{\mathbf{t}_i \mathbf{C}_2 \mathbf{t}'_i}},$$

184 where  $\mathbf{t}_i = \phi_{ik}$  is the  $i$ th row vector of the  $20 \times 3$  basis function matrix ( $\Phi$ ) with the  
185  $k$ th order of fit (Mrode, 2014). Here,  $\Phi$  is given as  $\mathbf{M}\mathbf{A}$ , where  $\mathbf{M}$  is a matrix of second  
186 order polynomials of standardized time values and  $\mathbf{A}$  is a matrix of coefficients for a second  
187 order Legendre polynomial (Kirkpatrick et al., 1990). We used the GIBBS3F90 program to  
188 estimate genetic parameters (Misztal et al., 2002).

## 189 Cross-validation scenarios

190 We investigated the prediction performance of genetic values for WU from RRM using two  
191 CV scenarios as shown in Figure 1. For each CV scenario, we compared three models as  
192 described below.

193 **CV1:** The objective of this scenario was to assess the ability of ST-RRM and MT-RRM to  
194 predict WU for a set of new accessions without records on WU. To this end, the accessions  
195 were split into testing and training sets with 245 accessions allocated to the training set and  
196 112 allocated to the testing set. First, we fitted ST-RRM using genomic and phenotypic  
197 data on the training subset and the genetic values of WU were predicted for all accessions  
198 in the testing set. This ST-RRM served as a baseline to evaluate MT-RRM. We evaluated  
199 two different types for MT-RRM. The first MT-RRM (MT-RRM1) can be thought of as  
200 a conventional genomic prediction application in which a model is fitted using a training  
201 population that has genomic data and phenotypic records for both traits. This model is  
202 used to predict genomic values for WU in a testing population that has genotypic data, but  
203 no records for either trait. In the second MT-RRM (MT-RRM2), complete PSA and WU  
204 records were available for the training population, while only PSA phenotypes were available

205 for the testing population. The rationale for this scenario is that it is often much easier to  
206 obtain non-destructive measurements for shoot biomass compared to WU. Thus, this can be  
207 thought of as a case in which a portion of the population has incomplete data.

208 Genetic values of testing individuals for WU at time  $t$  from ST-RRM and MT-RRM1  
209 were calculated by  $\hat{\mathbf{a}}_{\text{tst}}^t = \mathbf{G}_{\text{tst, trn}} \mathbf{G}_{\text{trn, trn}}^{-1} \hat{\mathbf{a}}_{\text{trn}}^t$ , where  $\mathbf{G}_{\text{tst, trn}}$  is the genomic relationship matrix  
210 between testing and training individuals,  $\mathbf{G}_{\text{trn, trn}}^{-1}$  is the inverse of genomic relationship matrix  
211 of training individuals, and  $\hat{\mathbf{a}}_{\text{trn}}^t = \mathbf{\Phi} \hat{\mathbf{u}}_{1, \text{trn}}$  is the vector of genetic values at time  $t$  (Momen  
212 et al., 2019a). On the other hand, the genetic values of testing individuals for WU from  
213 MT-RRM2 can be directly obtained from best linear unbiased prediction (BLUP) solutions  
214 because the model included the genomic relationship matrix of all accessions by fitting PSA  
215 phenotypes for the testing individuals. Thus, the genetic values of WU for the testing  
216 individuals at time  $t$  were computed by  $\hat{\mathbf{a}}_{\text{tst}}^t = \mathbf{\Phi} \hat{\mathbf{u}}_{1, \text{trn}}$ .

217 **CV2:** This cross-validation was designed to evaluate the ability of the MT-RRM and ST-  
218 RRM to predict genetic values of WU at future time points. Thus, it can be thought of as a  
219 forecasting approach. The training dataset consisted of phenotypic records for 245 randomly  
220 selected for the first 10 days of imaging. The models were used to predict genetic values for  
221 days 11 to 20. As with the first scenario, we assessed their genomic predictions by using  
222 ST-RRM and two kinds of MT-RRM from the training data. MT-RRM1 used records of  
223 WU and PSA from day 1 to day 10 of imaging as training data, while MT-RRM2 used WU  
224 records from the first 10 days of imaging and PSA values from 1 to 20 to train the model.  
225 We computed the genetic values of WU at day 11 to 20 as  $\mathbf{\Phi}_{11:20} \hat{\mathbf{u}}_{1, \text{trn}}$  where  $\mathbf{\Phi}_{11:20}$  is the  
226 basis function matrix at 11 to 20 days and  $\hat{\mathbf{u}}_{1, \text{trn}}$  is the vector of random additive genetic  
227 effect for WU of testing individuals.

228 To assess prediction accuracy, Pearson correlation was calculated between predicted ge-  
229 netic values and BLUE of WU at each time point in the testing population. Each CV  
230 scenario was repeated 10 times. We used the GIBBS3F90 program with a fixed variance  
231 option to perform genomic prediction in all the CV scenarios.

## 232 Results

### 233 Assessing temporal water use and shoot biomass trajectories in rice

234 To assess the temporal relationships between shoot biomass production and WU, a panel of  
235 357 rice accessions was phenotyped over a period of 20 days using a non-destructive image-  
236 based phenotyping platform. This system provides a means to non-destructively assess  
237 plant growth and morphology, and allows WU to be assessed throughout the duration of the  
238 experiment (Berger et al., 2010; Campbell et al., 2015; Fahlgren et al., 2015; Feldman et al.,  
239 2018).

240 Figure 2 shows a boxplot of the BLUE after an adjustment by fixed effects for WU over  
241 20 time days of imaging. WU exhibited an exponential trend over the 20 days of imaging  
242 and closely followed the temporal patterns exhibited by PSA.

### 243 Joint analysis of WU and PSA reveals shared additive genetic ef- 244 fects between traits

245 Genetic architectures of WU and PSA were dissected by estimating the proportion of cap-  
246 tured additive genetic variances across 20 days of imaging using a ST-RRM. The RRM  
247 included a fixed second order Legendre polynomial to capture the overall mean trajectories  
248 for each trait, and additive genetic and permanent environmental effects were modeled us-  
249 ing a second order Legendre polynomial. Figure 3 shows that PSA exhibited considerably  
250 higher narrow-sense heritability ( $h^2$ ) compared to WU. For instance,  $h^2$  ranged from 0.48 to  
251 0.82 for PSA, while the values ranged from 0.28 to 0.69 for WU. We observed an increasing  
252 trend over time with the lowest value observed on day 1 of imaging and the highest value  
253 observed on day 19. PSA on the other hand showed the lowest  $h^2$  values on day 1, but it  
254 quickly increased and reached somewhat of a plateau from day 3 to 16. After day 16,  $h^2$   
255 slowly declined. Collectively, these results indicate that both traits are influenced by addi-  
256 tive genetic effects, and these effects vary throughout time. However, phenotypic variance is

257 less influenced by non-genetic effects for PSA compared to WU. Moreover, additive genetic  
258 effects for WU show greater temporal variability compared to PSA.

259 To investigate genetic relationship between WU and PSA, we estimated genomic correla-  
260 tion at each time point. The MT-RRM used a second order polynomial to model the overall  
261 mean trends for each trait, as well as the additive genetic and permanent environmental  
262 effects for both traits. The genomic correlation between WU and PSA from MT-RRM is  
263 shown in Figure 4. A moderate to strong positive genomic correlation between WU and  
264 PSA was observed over 20 time periods. On average, the genomic correlation across all  
265 time periods was 0.73. The genomic correlation was low for the first time point, but quickly  
266 increased until the fourth day of imaging. From day 4 to the final day of imaging, genomic  
267 correlation showed a slight increasing trend. Genomic correlation ranged from 0.38 to 0.80,  
268 with the highest value observed on the final day of imaging. These results indicate that WU  
269 and PSA share similarity at the genetic level.

## 270 **Predictive assessment using RRM by two CV scenarios**

271 We next sought to evaluate the predictive performance of MT-RRM to predict genetic values  
272 for WU. To this end, we employed two CV scenarios. The first is similar to a conventional  
273 genomic prediction application in which the objective is to predict genetic values for a set  
274 of individuals without phenotypic records. We used two different testing populations. The  
275 first consists a set of 112 randomly selected accessions that have no phenotypic records for  
276 PSA and WU. The second consists of a set of 112 accessions that have phenotypic records  
277 for PSA, but lack records for WU. Thus, the latter scenario can be thought of as a case  
278 where a subset of the population has incomplete data. The predictive ability of MT-RRM1  
279 and MT-RRM2 was compared to a ST-RRM in which the model fitted using WU values  
280 for 245 accessions and is used to predict genetic values for the remaining 112 accessions. In  
281 all cases, the predictive ability was measured as the correlation between predicted genetic  
282 values and BLUE in the testing set at each time point.

283 The prediction accuracy for CV1 is shown in Figure 5. An increasing trend in prediction  
284 accuracy over time for all models was observed in CV1. Prediction accuracy increased quickly  
285 from day 1 to 13, and eventually plateaued from days 14 to 20. MT-RRM2 showed the highest  
286 prediction accuracy of all models. On average the predictive ability for MT-RRM2 was 0.68,  
287 while for MT-RRM1 and ST-RRM the prediction accuracies were 0.46 and 0.39, respectively.  
288 These results indicate that the predictive ability can be improved using a MT-RRM when  
289 records for one trait are available for individuals in the testing population. The predictive  
290 ability for MT-RRM1 was similar to ST-RRM during the first five time points, but slightly  
291 increased with 0.06 to 0.09 relative to ST-RRM from day 6 on ward. These results suggested  
292 that MT-RRM approach can be more effective method for genomic prediction of WU.

293 The objective of the second CV scenario was to evaluate the abilities of MT-RRM1 and  
294 MT-RRM2 to forecast genetic values at future time points using phenotypes recorded at  
295 earlier time points. The design of two MT-RRM were similar to those described above  
296 (Figure 1). The first MT-RRM, MT-RRM1, was fit using a training set with WU and PSA  
297 data collected from the first 10 time points, and was used to predict genetic values for WU for  
298 the subsequent time points. The second MT-RRM, MT-RRM2, was fit using PSA values for  
299 all 20 time points and WU values for the first 10 time points, and was used to predict genetic  
300 values for WU for the last 10 time points. Figure 6 shows the predictive correlation of WU  
301 for each of the models evaluated. The prediction accuracy for each method was relatively  
302 constant over all days. However, the prediction accuracy of MT-RRM were greatly higher  
303 than ST-RRM, indicating that inclusion of additional information from PSA can improve  
304 the ability to forecast WU. For ST-RRM, prediction accuracy ranged from 0.48 to 0.54, while  
305 values for MT-RRM1 and MT-RRM2 range from 0.72 to 0.80 and 0.80 to 0.89, respectively.  
306 Collectively, these results indicate that joint analysis of PSA and WU with the MT-RRM  
307 improves the ability to forecast future genetic values for WU.



## 308 Discussion

309 Advances in HTP has provided plant breeders with a new suite of tools to assess morphologi-  
310 cal and physiological traits in a non-destructive manner for large populations at frequent time  
311 intervals throughout the growing season (Fahlgren et al., 2015). These platforms facilitate  
312 the collection of data that provide important insights into the morpho-physiological basis of  
313 complex traits. Thus, with these technologies complex traits such as drought tolerance can  
314 be decomposed into component traits to better understand the basis of these traits and im-  
315 prove the development of varieties with increased resilience (Berger et al., 2010). Although  
316 these platforms provide a powerful means to quantify complex traits in large populations,  
317 some physiological traits require specialized equipment or must be recorded during a specific  
318 time of day (e.g., transpiration or chlorophyll fluorescence) (Tardieu et al., 2017). Thus, in  
319 many cases these data may only be available for a subset of the population.

320 HTP is often used to record a number of traits on the same individuals. In some cases,  
321 physiological traits that are difficult to measure may be correlated with traits that are more  
322 accessible and can be recorded with greater ease. In such cases, MT genomic prediction  
323 frameworks provide an excellent solution to utilize partial records and predict genetic val-  
324 ues for the physiological trait in individuals with missing data. Jia and Jannink (2012)  
325 demonstrated that MT models improve prediction accuracy particularly for traits with low  
326 heritability. In the current study, we utilized a MT approach in a RRM framework to pre-  
327 dict genetic values for WU, a difficult to measure trait with low heritability, by joint analysis  
328 with PSA, which exhibits higher heritability and is easier to measure. Since WU shows a  
329 positive correlation with PSA, we hypothesized that the MT-RRM framework can improve  
330 predictions for WU.

## 331 Genetic components of HTP image traits

332 Since WU is difficult to quantify directly in cereals such as rice, few studies have measured  
333 WU or water use efficiency, while most studies have sought to utilize indirect measurements  
334 of WU or water use efficiency for genetic analyses (This et al., 2010; Rebolledo et al., 2013;  
335 Feldman et al., 2018; Momen et al., 2019b). Consistent with the current study, Feldman  
336 et al. (2018), which utilized a HTP platform to quantify temporal water use and plant size  
337 in the C4 species *Setaria* grown in contrasting water regimes, reported moderate broad  
338 sense heritability ( $H^2$ ) values for WU, and higher  $H^2$  for plant size. Moreover, Feldman  
339 et al. (2018) showed that  $H^2$  varied throughout the experiment with lower  $H^2$  observed  
340 during the initial time points and higher  $H^2$  values observed during the middle time points.  
341 In our study,  $h^2$  values for WU in early time points were lower compared to those observed  
342 during the later time points. The plants in the current study were relatively small during  
343 the initial time points and therefore less amount of water is lost each day. Thus, water  
344 loss during these periods may be heavily influenced by environmental factors such as soil  
345 temperature or irradiation. Similar temporal trends have been reported for plant height  
346 in sorghum (Fernandes et al., 2018). Thus, given the moderate  $h^2$  values for WU and the  
347 temporal variability in  $h^2$ , selection for this trait may be difficult in breeding programs.  
348 Conversely,  $h^2$  for PSA was relatively stable throughout the experiment, indicating that  $h^2$   
349 for PSA may be less affected by temporal environmental effects compared to WU.

350 Multi-trait approaches are particularly advantageous when one target trait has low her-  
351 itability and is correlated to a secondary non-target trait with higher heritability (Mrode,  
352 2014). Joint analysis using a MT model can improve prediction of genetic values for low her-  
353 itability trait and thus improve selection in plant breeding programs. In the current study,  
354 we showed a benefit of using MT-RRM for WU which had a positive genomic correlation  
355 with PSA. Thus, we proposed that joint analysis of WU with PSA can improve predictions  
356 of genetic values for WU. In a recent study, Momen et al. (2019b) examined the relation-  
357 ships between single time point measurements of WU, root biomass, water use efficiency,

358 and PSA. According to the result, WU showed a moderate to strong positive correlation  
359 with PSA, root biomass, and water use efficiency, ranging from 0.48 to 0.85 (Momen et al.,  
360 2019b). Although we utilized PSA as the indicator trait in this study, it is expected that  
361 root biomass and water use efficiency can be leveraged for genomic prediction for WU using  
362 the MT.

## 363 **Predictive performance of MT-RRM**

364 The MT-RRM framework offers several advantages over conventional single-trait genomic  
365 best linear unbiased prediction (ST-GBLUP) approaches. First, the random regression  
366 framework provides a tractable means to predict genetic values for temporal traits. The  
367 RRM uses covariances functions to model the genetic and environmental covariance between  
368 time points, and has been shown to improve prediction of genetic values compared to a  
369 ST-GBLUP approach (Campbell et al., 2018). Secondly, because the covariance function  
370 expresses the genetic covariance between time points using a continuous function, the RRM  
371 can be used to predict genetic values at time points with no records (Momen et al., 2019a).  
372 Thus, we can leverage the RRM framework to forecast future genetic values. Finally, as  
373 mentioned above, the joint analysis of MT can improve prediction accuracy for traits with  
374 low heritability. In the current study, we designed two CV to evaluate the ability to predict  
375 genetic values in unobserved accessions for a trait with lower heritability, and assessed the  
376 ability of the MT-RRM to predict future genetic values for accessions with records.

377 The first CV scenario was designed to evaluate the ability of MT-RRM to predict ge-  
378 netic values for WU in accessions without any records. Consistent with our expectations,  
379 MT-RRM had a better predictive ability than ST-RRM. The predictive ability of the MT-  
380 RRM was further improved when PSA records were available for accessions in the testing  
381 population. The effectiveness of MT genomic models has been investigated extensively and  
382 have reported improved prediction accuracy compared to a ST model (Jia and Jannink,

383 2012; Guo et al., 2014; Okeke et al., 2017; Fernandes et al., 2018). For instance, Guo et al.  
384 (2014) compared prediction accuracy from ST- and MT-GBLUP using simulated data. MT-  
385 GBLUP showed better predictive performance when the target trait had lower heritability  
386 compared to the non-target trait and when the target trait had a greater number of missing  
387 observations (Guo et al., 2014). However, the majority of these studies have focused on  
388 traits recorded at a single time point. In the current study, we used a MT approach for  
389 prediction of bivariate traits with longitudinal records, and observed similar results. As sug-  
390 gested by the previous studies, an increase of prediction accuracy by MT-RRM in this study  
391 may result from a relative lower heritability of WU than PSA and the high degree of shared  
392 genetic signals with PSA (Momen et al., 2019b). The results of CV1 showed that prediction  
393 accuracies from all the models were more stable at later time periods, which is similar to the  
394 temporal trends in prediction accuracy observed for PSA reported by Momen et al. (2019a)  
395 that was obtained using a ST-RRM. The accuracy of genomic prediction largely depends  
396 on the heritability of the trait (Hayes et al., 2009). Thus, the lower predictions at the ini-  
397 tial time points may be the result of the lower heritability observed during these periods.  
398 Moreover, early observations are recorded on seedlings that have just started to tiller. At  
399 this stage the plants may not have accumulated enough biomass and have low transpiration  
400 demands, to discern genotypic variation in water use from environmental variation.

401 Genomic predictions based on small number of records are a major concern in many  
402 practical applications, especially for a trait that is difficult or costly to measure because  
403 it can reduce phenotyping costs. As expected, the MT approaches (MT-RRM1 and MT-  
404 RRM2) in CV2 resulted in improvements compared to the ST-RRM with gains of 0.25 and  
405 0.33, on average, for MT-RRM1 and MT-RRM2, respectively. Our results suggest that  
406 MT-RRM can be a powerful approach for forecasting future phenotypes using records from  
407 earlier periods. In this study, we examined prediction accuracies from 11 to 20 days in CV2.  
408 However, the trends in prediction accuracy were relatively stable across time points. Thus,  
409 forecasting based on records at further earlier time periods could be implemented without a

410 loss of prediction accuracy as reported by Momen et al. (2019a). However, the performance  
411 of these forecasting approaches will likely be highly dependent on the genomic correlation  
412 between the time points used to train the prediction model and the time points in which  
413 predictions will be made. Lastly, it should be noted that the best prediction performance  
414 delivered by MT-RRM2 in both scenarios may be due to the fact that the training-testing  
415 sets partitioning is not completely independent in a strict sense. However, a situation akin  
416 to this occurs in practice and an approach such as MT-RRM2 would be still worthwhile to  
417 test.

## 418 **Conclusion**

419 To our knowledge, this is the first study that applied the MT-RRM to HTP-derived temporal  
420 traits in plants. We demonstrated that MT-RRM is a robust and flexible approach that can  
421 be used to improve prediction accuracy for a trait with a limited number of records or low  
422 heritability. Thus, in the case of breeding for morpho-physiological traits, the MT-RRM can  
423 improve prediction accuracy for physiological traits that may have low heritability or are  
424 difficult to measure in large populations.

## 425 **Acknowledgments**

426 This work was supported by the National Science Foundation under Grant Number 1736192  
427 to HW and GM, and Virginia Polytechnic Institute and State University startup funds to  
428 GM.

## 429 **Author contribution statement**

430 This work was supported by the National Science Foundation under Grant Number 1736192  
431 to HW and GM, and Virginia Polytechnic Institute and State University startup funds to  
432 GM. MTC and HW designed and conducted the experiments. TB and MM analyzed the  
433 data. TB and GM conceived the idea and wrote the manuscript. MTC, MM and HW  
434 discussed results and revised the manuscript. GM supervised and directed the study. All  
435 authors read and approved the manuscript.

436 **Figures**

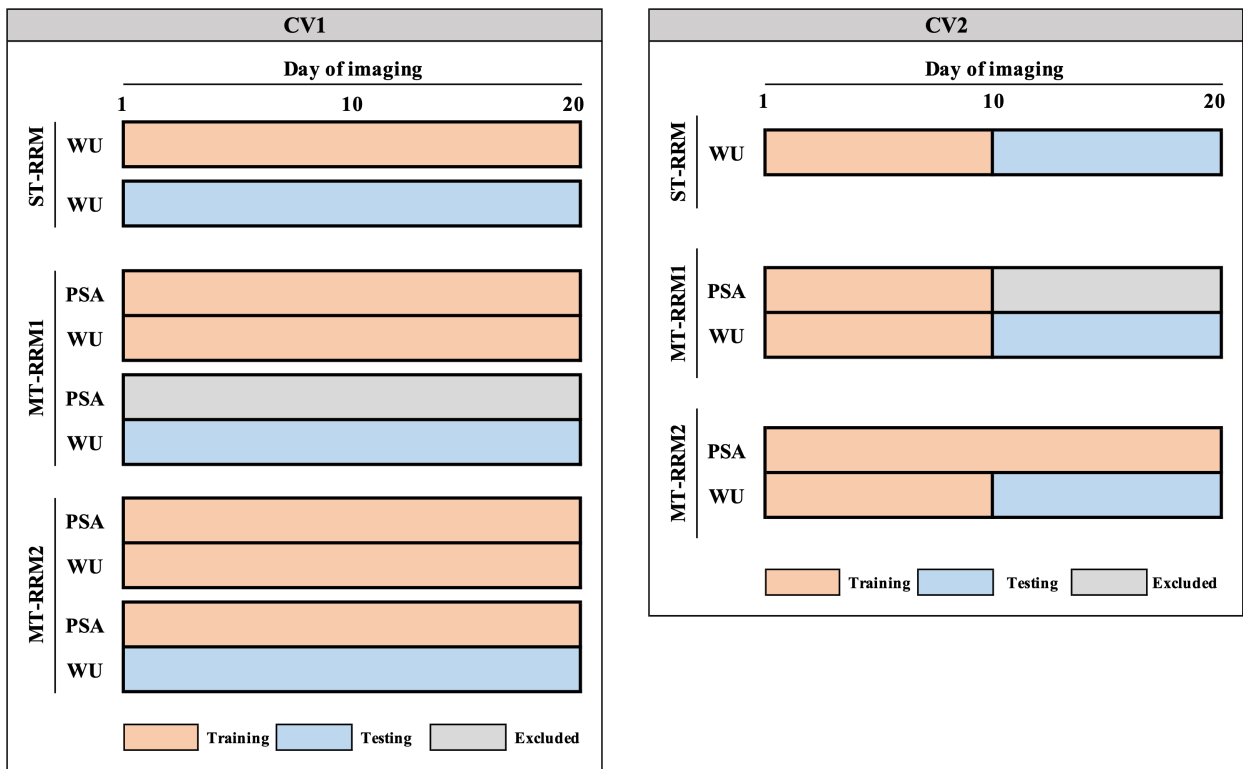

Figure 1: Two scenarios of cross-validation (CV) designed to investigate prediction accuracy of water use (WU) from single- and multi-trait random regression models (ST-RRM, MT-RRM1, and MT-RRM2). CV1: Prediction of WU for a set of 112 accessions without records on WU using 245 training accessions. ST-RRM: single-trait random regression model using WU of training accessions; MT-RRM1: multi-trait random regression model using WU and projected shoot area (PSA) of training accessions; MT-RRM2: multi-trait random regression model using WU and PSA of training accessions as well as PSA of testing accessions. CV2: Forecast future genetic values of WU belonging to 245 known accessions from records at earlier time periods. ST-RRM: single-trait random regression model for WU using the first 10 time points in training accessions; MT-RRM1: multi-trait random regression model for WU using the first 10 time points of WU and PSA information in training accessions; MT-RRM2: multi-trait random regression model for WU using WU from 1 to 10 time periods and PSA at all the time periods in training accessions.

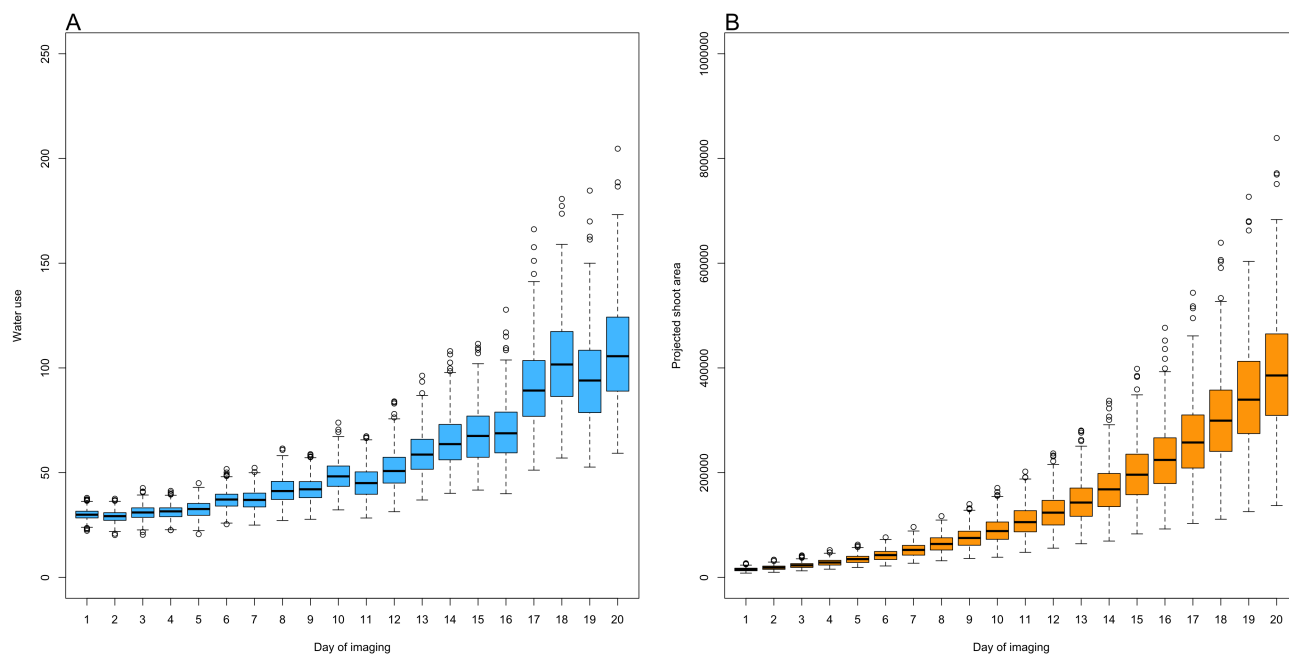

Figure 2: A boxplot of best linear unbiased estimator for water use (A) and projected shoot area (B) over 20 days of imaging.



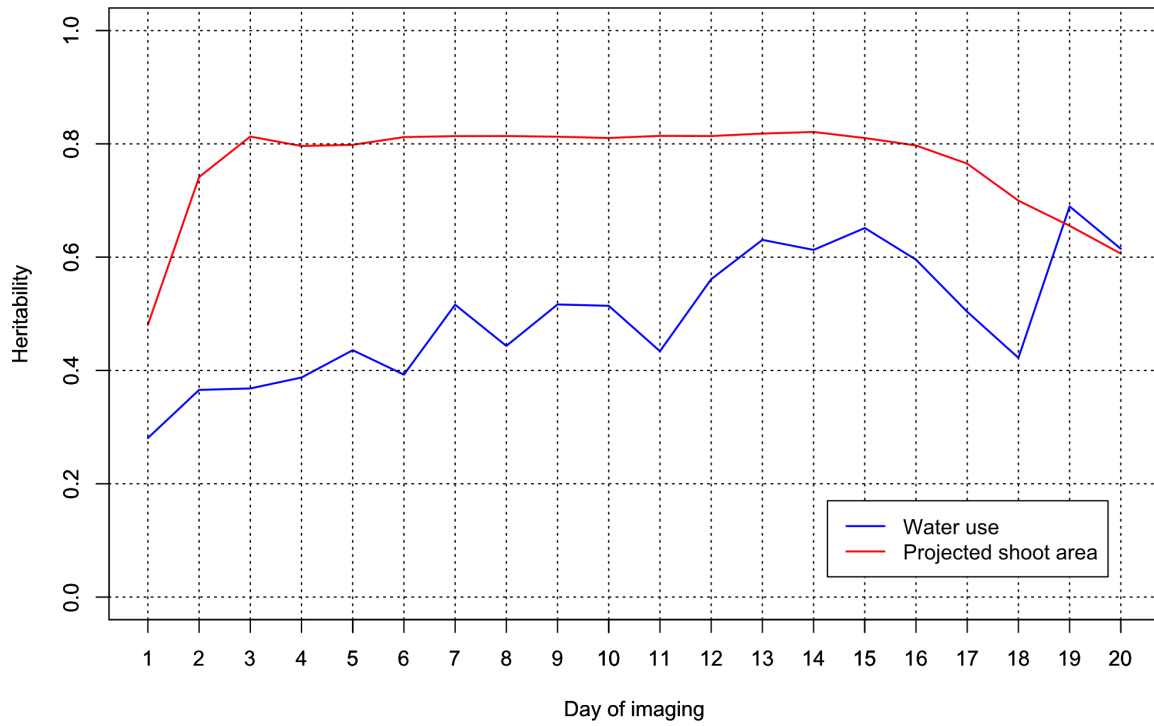

Figure 3: Heritability for water use and projected shoot area over 20 days of imaging using a single-trait random regression model.

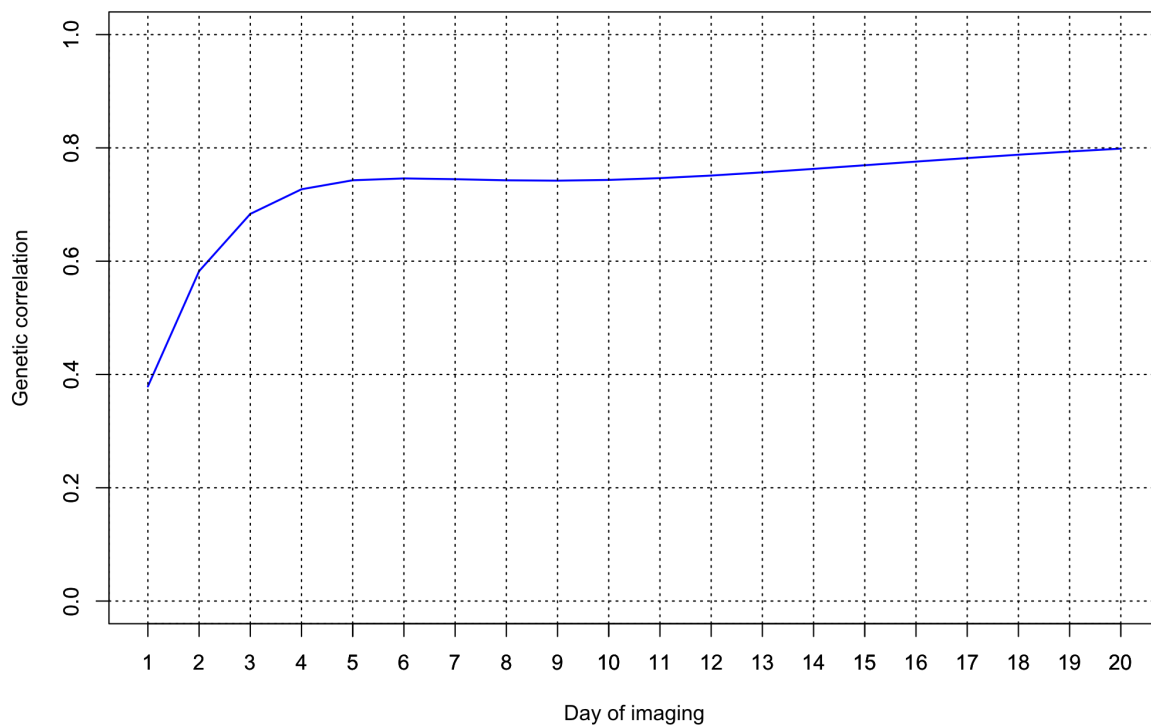

Figure 4: Genomic correlation between water use and projected shoot area over 20 days of imaging using a multi-trait random regression model.

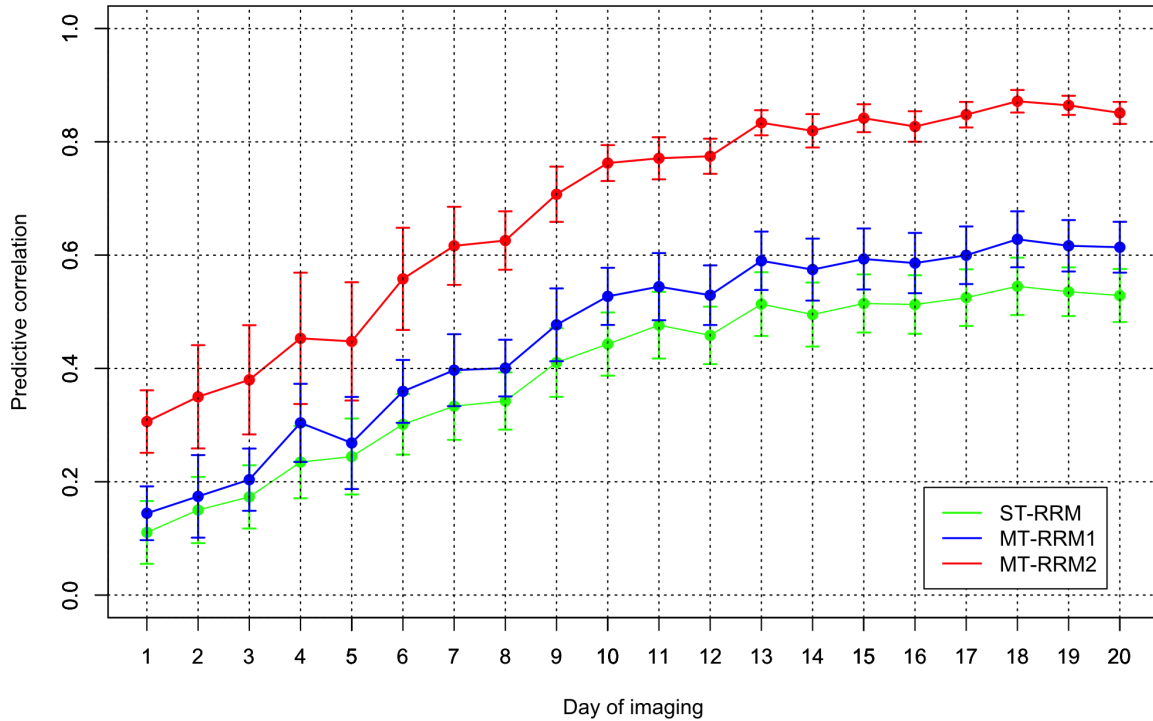

Figure 5: Pearson correlation of water use from cross-validation scenario 1. ST-RRM: single-trait random regression model; MT-RRM1: multi-trait random regression model using the water use and projected shoot area of training data; MT-RRM2: multi-trait random regression model using the water use and projected shoot area of training data as well as the PSA of testing data.

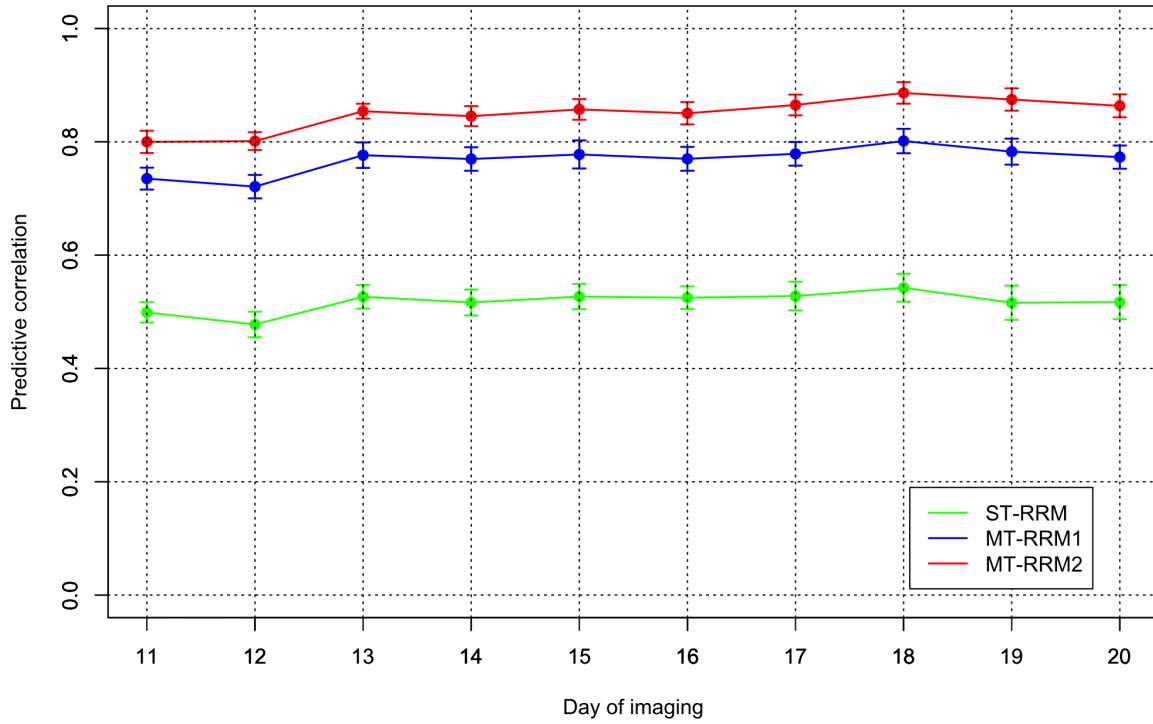

Figure 6: Pearson correlation of water use from cross-validation scenario 2. ST-RRM: single-trait random regression model; MT-RRM1: multi-trait random regression model using WU and PSA from 1 to 10 time periods in the training data; MT-RRM2: multi-trait random regression model using WU from 1 to 10 time periods and PSA at all the time periods in the training data.

## 437 References

- 438 Araus, J. L., Kefauver, S. C., Zaman-Allah, M., Olsen, M. S., and Cairns, J. E. (2018).  
439 Translating high-throughput phenotyping into genetic gain. *Trends in Plant Science*,  
440 23(5):451–466.
- 441 Berger, B., Parent, B., and Tester, M. (2010). High-throughput shoot imaging to study  
442 drought responses. *Journal of Experimental Botany*, 61(13):3519–3528.
- 443 Browning, S. R. and Browning, B. L. (2007). Rapid and accurate haplotype phasing and  
444 missing-data inference for whole-genome association studies by use of localized haplotype  
445 clustering. *The American Journal of Human Genetics*, 81(5):1084–1097.
- 446 Calus, M. P. and Veerkamp, R. F. (2011). Accuracy of multi-trait genomic selection using  
447 different methods. *Genetics Selection Evolution*, 43(1):26.
- 448 Campbell, M., Momen, M., Walia, H., and Morota, G. (2019). Leveraging breeding values  
449 obtained from random regression models for genetic inference of longitudinal traits. *The*  
450 *Plant Genome*.
- 451 Campbell, M., Walia, H., and Morota, G. (2018). Utilizing random regression models for ge-  
452 nomic prediction of a longitudinal trait derived from high-throughput phenotyping. *Plant*  
453 *Direct*, 2(9):e00080.
- 454 Campbell, M. T., Knecht, A. C., Berger, B., Brien, C. J., Wang, D., and Walia, H. (2015).  
455 Integrating image-based phenomics and association analysis to dissect the genetic archi-  
456 tecture of temporal salinity responses in rice. *Plant Physiology*, 168(4):1476–1489.
- 457 Cullis, B. R., Smith, A. B., and Coombes, N. E. (2006). On the design of early generation  
458 variety trials with correlated data. *Journal of Agricultural, Biological, and Environmental*  
459 *Statistics*, 11(4):381.

- 460 Fahlgren, N., Gehan, M. A., and Baxter, I. (2015). Lights, camera, action: high-throughput  
461 plant phenotyping is ready for a close-up. *Current Ppinion in Plant Biology*, 24:93–99.
- 462 Feldman, M. J., Ellsworth, P. Z., Fahlgren, N., Gehan, M. A., Cousins, A. B., and Baxter,  
463 I. (2018). Components of water use efficiency have unique genetic signatures in the model  
464 *c4* grass setaria. *Plant Physiology*, 178(2):699–715.
- 465 Fernandes, S. B., Dias, K. O., Ferreira, D. F., and Brown, P. J. (2018). Efficiency of multi-  
466 trait, indirect, and trait-assisted genomic selection for improvement of biomass sorghum.  
467 *Theoretical and Applied Genetics*, 131(3):747–755.
- 468 Gengler, N., Tijani, A., Wiggans, G., and Misztal, I. (1999). Estimation of (co) variance func-  
469 tion coefficients for test day yield with a expectation-maximization restricted maximum  
470 likelihood algorithm. *Journal of Dairy Science*, 82(8):1849–e1.
- 471 Golzarian, M. R., Frick, R. A., Rajendran, K., Berger, B., Roy, S., Tester, M., and Lun,  
472 D. S. (2011). Accurate inference of shoot biomass from high-throughput images of cereal  
473 plants. *Plant Methods*, 7(1):2.
- 474 Guo, G., Zhao, F., Wang, Y., Zhang, Y., Du, L., and Su, G. (2014). Comparison of single-  
475 trait and multiple-trait genomic prediction models. *BMC Genetics*, 15(1):30.
- 476 Hayes, B. J., Bowman, P. J., Chamberlain, A., and Goddard, M. (2009). Invited review:  
477 Genomic selection in dairy cattle: Progress and challenges. *Journal of Dairy Science*,  
478 92(2):433–443.
- 479 Jia, Y. and Jannink, J.-L. (2012). Multiple-trait genomic selection methods increase genetic  
480 value prediction accuracy. *Genetics*, 192(4):1513–1522.
- 481 Juliana, P., Montesinos-López, O. A., Crossa, J., Mondal, S., Pérez, L. G., Poland, J.,  
482 Huerta-Espino, J., Crespo-Herrera, L., Govindan, V., Dreisigacker, S., et al. (2019). In-

- 483     tegrating genomic-enabled prediction and high-throughput phenotyping in breeding for  
484     climate-resilient bread wheat. *Theoretical and Applied Genetics*, 132(1):177–194.
- 485     Kadarmideen, H. N., Thompson, R., Coffey, M. P., and Kossaibati, M. A. (2003). Genetic  
486     parameters and evaluations from single-and multiple-trait analysis of dairy cow fertility  
487     and milk production. *Livestock Production Science*, 81(2-3):183–195.
- 488     Kirkpatrick, M., Lofsvold, D., and Bulmer, M. (1990). Analysis of the inheritance, selection  
489     and evolution of growth trajectories. *Genetics*, 124(4):979–993.
- 490     Knecht, A. C., Campbell, M. T., Caprez, A., Swanson, D. R., and Walia, H. (2016). Image  
491     Harvest: an open-source platform for high-throughput plant image processing and analysis.  
492     *Journal of Experimental Botany*, 67(11):3587–3599.
- 493     Meyer, K. and Hill, W. G. (1997). Estimation of genetic and phenotypic covariance functions  
494     for longitudinal or repeated records by restricted maximum likelihood. *Livestock Production  
495     Science*, 47(3):185–200.
- 496     Misztal, I., Tsuruta, S., Strabel, T., Auvray, B., Druet, T., Lee, D., et al. (2002). Blupf90  
497     and related programs (bgf90). In *Proceedings of the 7th world congress on genetics applied  
498     to livestock production*, volume 33, pages 743–744.
- 499     Momen, M., Campbell, M. T., Walia, H., and Morota, G. (2019a). Predicting longitudinal  
500     traits derived from high-throughput phenomics in contrasting environments using genomic  
501     legendre polynomials and b-splines. *G3: Genes, Genomes, Genetics*, page In press.
- 502     Momen, M., Campbell, M. T., Walia, H., and Morota, G. (2019b). Utilizing trait networks  
503     and structural equation models as tools to interpret multi-trait genome-wide association  
504     studies. *bioRxiv*, page 553008.
- 505     Morota, G., Jarquin, D., Campbell, M. T., and Iwata, H. (2019). Statistical methods for

506 the quantitative genetic analysis of high-throughput phenotyping data. *arXiv preprint*  
507 *arXiv:1904.12341*.

508 Mrode, R. A. (2014). *Linear models for the prediction of animal breeding values*. Cabi.

509 Okeke, U. G., Akdemir, D., Rabbi, I., Kulakow, P., and Jannink, J.-L. (2017). Accuracies  
510 of univariate and multivariate genomic prediction models in african cassava. *Genetics*  
511 *Selection Evolution*, 49(1):88.

512 Rebolledo, M. C., Luquet, D., Courtois, B., Henry, A., Soulié, J.-C., Rouan, L., and  
513 Dingkuhn, M. (2013). Can early vigour occur in combination with drought tolerance  
514 and efficient water use in rice genotypes? *Functional Plant Biology*, 40(6):582–594.

515 Schaeffer, L. (2004). Application of random regression models in animal breeding. *Livestock*  
516 *Production Science*, 86(1-3):35–45.

517 Schaeffer, L. and Dekkers, J. (1994). Random regressions in animal models for test-day  
518 production in dairy cattle. In *World Congress of Genetics Applied Livestock Production,*  
519 *1994*, volume 18, pages 443–446.

520 Sun, J., Rutkoski, J. E., Poland, J. A., Crossa, J., Jannink, J.-L., and Sorrells, M. E.  
521 (2017). Multitrait, random regression, or simple repeatability model in high-throughput  
522 phenotyping data improve genomic prediction for wheat grain yield. *The Plant Genome*.

523 Tardieu, F., Cabrera-Bosquet, L., Pridmore, T., and Bennett, M. (2017). Plant phenomics,  
524 from sensors to knowledge. *Current Biology*, 27(15):R770–R783.

525 This, D., Comstock, J., Courtois, B., Xu, Y., Ahmadi, N., Vonhof, W. M., Fleet, C., Setter,  
526 T., and McCouch, S. (2010). Genetic analysis of water use efficiency in rice (*oryza sativa*  
527 l.) at the leaf level. *Rice*, 3(1):72.

528 VanRaden, P. M. (2008). Efficient methods to compute genomic predictions. *Journal of*  
529 *Dairy Science*, 91(11):4414–4423.



- 530 Voss-Fels, K. P., Cooper, M., and Hayes, B. J. (2019). Accelerating crop genetic gains with  
531 genomic selection. *Theoretical and Applied Genetics*, 132(3):669–686.
- 532 Zhao, K., Tung, C.-W., Eizenga, G. C., Wright, M. H., Ali, M. L., Price, A. H., Norton,  
533 G. J., Islam, M. R., Reynolds, A., Mezey, J., et al. (2011). Genome-wide association  
534 mapping reveals a rich genetic architecture of complex traits in *oryza sativa*. *Nature*  
535 *Communications*, 2:467.
